# Supplementary material for: RAS signaling pathway is essential in regulating PIEZO1‐mediated hepatic iron overload in dehydrated hereditary stomatocytosis
Source: PubMed Central journal article supplement — Am J Hematol. 2024 Nov 18;100(1):52–65. doi: 10.1002/ajh.27523 (PMC11625994; doi:10.1002/ajh.27523), 2024-11-18
Supplement: AJH-100-52-s001.pdf [file AJH-100-52-s001.pdf]

**RAS signaling pathway is essential in regulating PIEZO1-mediated hepatic iron overload in dehydrated hereditary stomatocytosis.**

Barbara Eleni Rosato<sup>1,2</sup>, Vanessa D'Onofrio<sup>1,2</sup>, Roberta Marra<sup>1,2</sup>, Antonella Nostro<sup>1,2</sup>, Federica Maria Esposito<sup>1,2</sup>, Anthony Iscaro<sup>1,2</sup>, Vito Alessandro Lasorsa<sup>1,2</sup>, Mario Capasso<sup>1,2</sup>, Achille Iolascon<sup>1,2</sup>, Roberta Russo<sup>1,2</sup>, Immacolata Andolfo<sup>1,2</sup>

<sup>1</sup>Department of Molecular Medicine and Medical Biotechnologies, "Federico II" University of Naples, Naples, Italy

<sup>2</sup>CEINGE, Biotechnologie Avanzate, Franco Salvatore. Naples, Italy

**Supplementary Material contains:**

**Supplementary table 1**

**Supplementary table 2**

**Supplementary figure 1**

**Supplementary figure 2**

**Supplementary figure 3**

| <i>Gene ID</i>                                 | <b>Forward Primer</b> | <b>Reverse Primer</b>  |
|------------------------------------------------|-----------------------|------------------------|
| <i>PIEZO1</i>                                  | TCCTCTGTCTGCCTCGGC    | GGCATCCACATCCCTCTCAT   |
| <i>HAMP</i>                                    | ACAACAGACGGGACAACCTTG | CAGCACATCCCACACTTTGA   |
| <i>SMAD6</i>                                   | AACTCCCTCATCACTGCTCC  | GTGCTCCCAGTACGCCAC     |
| <i>R-RAS</i>                                   | CCATCCAGTTCATCCAGTCCT | TGCAGATCTTCGTGTAGGAGT  |
| <i>F2</i>                                      | GGATCCGCATCACTGACAAC  | CCCCACTGTCACCTTCACA    |
| <i>ITGB4</i>                                   | AAGAAGGCCCCAGTGAAGAG  | GGTCCCTGAACATCTCGTCT   |
| <i>RAC2</i>                                    | CTACACCACCAACGCCTTTC  | GTTCACTGGCTTGCTGTCC    |
| <i>PDGFRB</i>                                  | TCAATGTCCCTGTCCGAGTG  | ACTGTCTGTTCCCCACTGTC   |
| <i>r-ras</i>                                   | GAGTTTCAATGAGGTGGGCA  | CTGCCTTGTTCCCAACCAAC   |
| <i>hamp</i>                                    | TTGCGATACCAATGCAGAAG  | GGATGTGGCTCTAGGCTATGTT |
| <b>TaqMan Probe (Thermo Fisher Scientific)</b> |                       |                        |
| <i>ID1</i>                                     | Hs03676575_s1         |                        |
| <i>ID3</i>                                     | Hs00171409_m1         |                        |

**Supplementary table 1** *Oligonucleotides sequences used for qRT-PCR and TaqMan assays*

| <b>Reagent</b>                                   | <b>Volume</b> |
|--------------------------------------------------|---------------|
| <b>Loading Buffer</b>                            |               |
| PowerLoad™ concentrate, 100X                     | 100 µL        |
| FluxOR™ reagent, reconstituted in DMSO           | 10 µL         |
| Deionized water                                  | 8.8 mL        |
| FluxOR™ assay buffer, 10X                        | 1 mL          |
| Probenecid, reconstituted in deionized water     | 100 µL        |
| <b>Assay Buffer (adjusted pH 7.4, with NaOH)</b> |               |
| Deionized water                                  | 8.7 mL        |
| FluxOR™ assay buffer, 10X (Component B)          | 1 mL          |
| 1 M HEPES                                        | 200 µL        |
| Probenecid, reconstituted in deionized water     | 100 µL        |
| <b>Stimulus Buffer</b>                           |               |
| Deionized water                                  | 2.5 mL        |
| FluxOR™ chloride-free buffer, 5X                 | 1 mL          |
| K <sub>2</sub> SO <sub>4</sub> concentrate       | 1 mL          |
| Tl <sub>2</sub> SO <sub>4</sub> concentrate      | 0.5 mL        |

**Supplementary table 2.** *Manufacturer's recipe of FluxOR™ Potassium Ion Channel Assay buffers.*

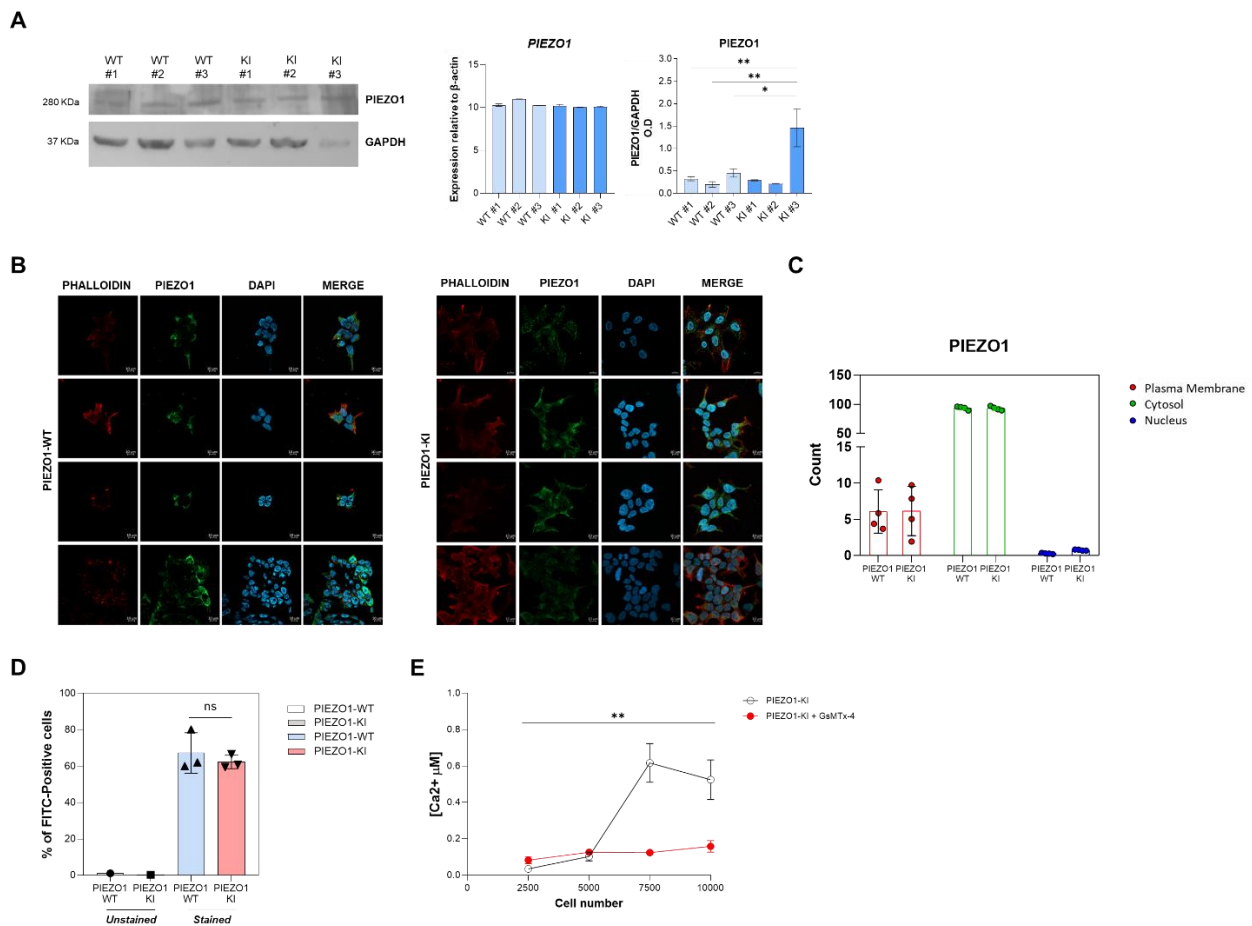

**Supplementary figure 1. A) Left panel.** Representative immunoblotting of PIEZO1 in three different single clones from PIEZO1-WT and PIEZO1-KI cells, respectively. GAPDH was used as the loading control. **Left panel.** PIEZO1 mRNA expression relative to  $\beta$ -actin and densitometric analysis normalized to GAPDH in three different single clones from PIEZO1-WT (light blue) and PIEZO1-KI cells (blue). \* $p < 0.05$ , \*\* $p < 0.01$  by ANOVA test and post-hoc correction by Sidak's multiple comparison tests. **B)** Representative confocal imaging by ZEISS LSM 980 Airyscan 2 of PIEZO1-WT and PIEZO1-KI cells are shown. Rabbit anti-PIEZO1 antibody was used to stain the PIEZO1 protein (green). Phalloidin was used as a cytoskeleton marker (red), and DAPI was used as a nuclear marker (blue). Overlapping of both signals (MERGE) is shown on the right (yellow). Scale bar 10 $\mu$ m. Four representative visual fields are shown. **C)** Histograms showing quantification of PIEZO1 molecule stained in Plasma Membrane (red histograms), Cytoplasm (green histograms), and nucleus (blue histograms). **D)** Bar graph showing the parentage of Alexa488-positive cells in PIEZO1-WT and PIEZO1-KI cells stained or not (unstained) with PIEZO1-Alexa-Fluor 488. \*\* $p < 0.01$  by ANOVA test and post-hoc correction by Sidak's multiple comparison tests. PIEZO1-WT or PIEZO1-KI stained with PIEZO1-Alexa-Fluor 488 vs unstained cells. **E)** Quantification of total intracellular Ca<sup>2+</sup> concentrations in PIEZO1-KI at increased cell confluence treated or not with PIEZO1 GsMTx-4 (red line). Data are means  $\pm$  SD of three experiments and are normalized on protein concentrations (\*\* $p < 0.01$ , PIEZO1-KI 10000 cells vs 2500; 10000 cells vs 5000cells, by ANOVA test and post-hoc correction by Sidak's multiple comparison tests).

**A**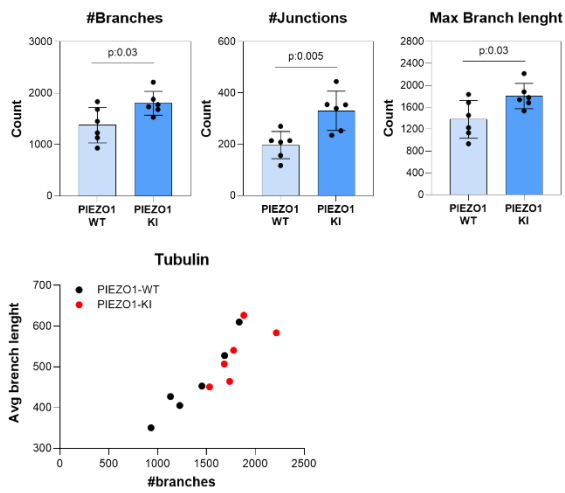**B**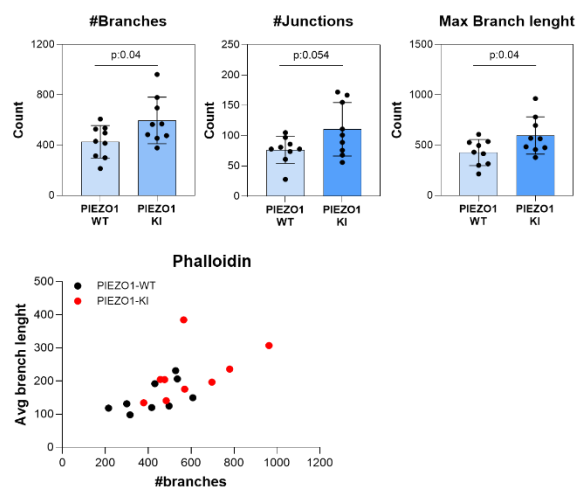

**Supplementary figure 2.** Histograms showing different parameters obtained from ImageJ analysis of stress fibers of the cytoskeleton in PIEZO1-WT (light blue) and PIEZO1-KI (dark blue) cells stained with Tubulin (**A**) and Phalloidin (**B**). Data are means  $\pm$  standard deviation of six different acquisitions. The number of Branches, Junctions, and Maximum branch length are expressed as Count. The #end-point and average branch length are related to the respective #branches. pValue calculated for each parameter by Unpaired t-test

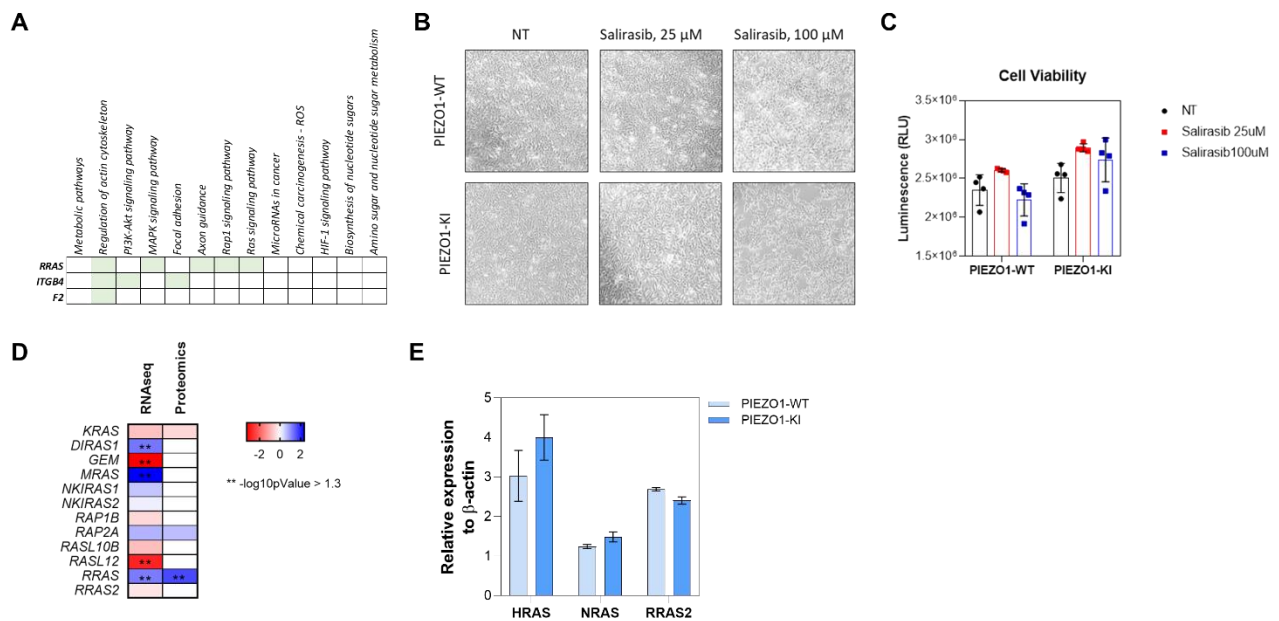

**Supplementary figure 3.** **A)** Schematic representation of the presence of *RRAS*, *ITGB4*, and *F2* genes along deregulated pathways. **B)** Representative images of PIEZO1-WT and PIEZO1-KI cells treated or not with Salirasib (25 and 100  $\mu\text{M}$ ). **C)** Histogram showing cell viability of PIEZO1-WT and PIEZO1-KI cells treated or not with Salirasib (25 $\mu\text{M}$ , red columns and 100  $\mu\text{M}$ , blue columns). Data are means  $\pm$  SD of four independent measurements. **E)** Expression heatmap for upregulated (blue) and downregulated (red) genes and proteins belonging to RAS signaling super-pathway from PathCards. Data are presented as a mean of three replicates.  $**\text{-log}_{10}(\text{pValue}) \geq 1.3$ . **F)** Histograms showing mRNA levels of *HRAS*, *NRAS*, and *RRAS2* in PIEZO1-WT (light blue) and PIEZO1-KI (blue) cells. Data are presented as mean  $\pm$  SD of three independent experiments.
